# Supplementary material for: Communication Tools Used in Cancer Communication with Children: A Scoping Review
Source: MDPI journal article supplement (doi:10.3390/cancers14194624), 2022-09-23
Supplement: s1 [file s1]

## Supplementary file: Search Strategies

### **A. CENTRAL**

Advanced Search/Search Manager

#1 ((Child\* or Preschool\* or Adolescen\* or Teen\* or Young or Youth\* or Schoolchild\* or Pediatric\* or Paediatric\* or Boys or Girls) and (Cancer\* or Carcinoma\* or Tumour\* or Tumor\* or Malignan\* or Metasta\* or Neoplas\* or Leukaemi\* or Leukemi\* or Lymphoma\* or Sarcoma\* or Carcinoma\* or Oncolog\* or Radiotherap\* or "Radio Therap\*" or Chemotherap\* or Lifethreatening or "Life Threatening" or Terminally Ill or Terminal Illness\* or Terminal Condition\* or "Terminal Care" or Palliative or Hospice\* or "End of Life") and (Communicat\* or Video\* or Audio\* or Multimedi\* or Multi-Media or Hypermedia or Book or Booklet\* or Comic\* or Books or Fiction\* or Manga\* or Pamphlet\* or Brochure\* or Movie\* or Film\* or Motion Picture\* or Cinema\* or CD-ROM or DVD or Compact Disk\* or Compact Disc\* or Game or Games or Gaming or Internet or Web or Website\* or Computer or Play or Plays or Roleplay\* or Story\* or Stories or Song or Songs or Sing or Singing or Tale or Tales or Toy or Toys or App or Apps or Mobile Application\* or Phone Application\* or Smartphone Application\* or iPhone Application\* or Disclos\* or Decision Making or Bad News or Doll or Dolls or Art or Arts or Music\* or Painting\* or Drawing\*))):ti in Trials 178

### **B. CINAHL**

Advanced Search

S1 TI (Child\* OR Preschool\* OR Adolescen\* OR Teen\* OR Young OR Youth\* OR Schoolchild\* OR Pediatric\* OR Paediatric\* OR Boys OR Girls) AND (Cancer\* OR Carcinoma\* OR Tumour\* OR Tumor\* OR Malignan\* OR Metasta\* OR Neoplas\* OR Leukaemi\* OR Leukemi\* OR Lymphoma\* OR Sarcoma\* OR Carcinoma\* OR Oncolog\* OR Radiotherap\* OR "Radio Therap\*" OR Chemotherap\* OR Lifethreatening OR "Life Threatening" OR Terminally Ill OR Terminal Illness\* OR Terminal Condition\* OR "Terminal Care" OR Palliative OR Hospice\* OR "End of Life") AND (Communicat\* OR Video\* OR Audio\* OR Multimedi\* OR Multi-Media OR Hypermedia OR Book OR Booklet\* OR Comic\* OR Books OR Fiction\* OR Manga\* OR Pamphlet\* OR Brochure\* OR

Movie\* OR Film\* OR Motion Picture\* OR Cinema\* OR CD-ROM OR DVD OR Compact Disk\* OR Compact Disc\* OR Game OR Games OR Gaming OR Internet OR Web OR Website\* OR Computer OR Play OR Plays OR Roleplay\* OR Story\* OR Stories OR Song OR Songs OR Sing OR Singing OR Tale OR Tales OR Toy OR Toys OR App OR Apps OR Mobile Application\* OR Phone Application\* OR Smartphone Application\* OR iPhone Application\* OR Disclos\* OR Decision Making OR Bad News OR Doll OR Dolls OR Art OR Arts OR Music\* OR Painting\* OR Drawing\*)

Limiters - Exclude MEDLINE records 512

### ***C. Embase***

1 ((Child\* or Preschool\* or Adolescen\* or Teen\* or Young or Youth\* or Schoolchild\* or Pediatric\* or Paediatric\* or Boys or Girls) and (Cancer\* or Carcinoma\* or Tumour\* or Tumor\* or Malignan\* or Metasta\* or Neoplas\* or Leukaemi\* or Leukemi\* or Lymphoma\* or Sarcoma\* or Carcinoma\* or Oncolog\* or Radiotherap\* or "Radio Therap\*" or Chemotherap\* or Lifethreatening or "Life Threatening" or Terminally Ill or Terminal Illness\* or Terminal Condition\* or "Terminal Care" or Palliative or Hospice\* or "End of Life") and (Communicat\* or Video\* or Audio\* or Multimed\* or Multi-Media or Hypermedia or Book or Booklet\* or Comic\* or Books or Fiction\* or Manga\* or Pamphlet\* or Brochure\* or Movie\* or Film\* or Motion Picture\* or Cinema\* or CD-ROM or DVD or Compact Disk\* or Compact Disc\* or Game or Games or Gaming or Internet or Web or Website\* or Computer or Play or Plays or Roleplay\* or Story\* or Stories or Song or Songs or Sing or Singing or Tale or Tales or Toy or Toys or App or Apps or Mobile Application\* or Phone Application\* or Smartphone Application\* or iPhone Application\* or Disclos\* or Decision Making or Bad News or Doll or Dolls or Art or Arts or Music\* or Painting\* or Drawing\*)).ti. (1570)

2 limit 1 to embase (754)

### ***D. PsycINFO***

1 ((Child\* or Preschool\* or Adolescen\* or Teen\* or Young or Youth\* or Schoolchild\* or Pediatric\* or Paediatric\* or Boys or Girls) and (Cancer\* or Carcinoma\* or Tumour\* or Tumor\* or Malignan\* or Metasta\* or Neoplas\* or Leukaemi\* or Leukemi\* or Lymphoma\* or Sarcoma\* or

Carcinoma\* or Oncolog\* or Radiotherap\* or "Radio Therap\*" or Chemotherap\* or Lifethreatening or "Life Threatening" or Terminally Ill or Terminal Illness\* or Terminal Condition\* or "Terminal Care" or Palliative or Hospice\* or "End of Life") and (Communicat\* or Video\* or Audio\* or Multimedi\* or Multi-Media or Hypermedia or Book or Booklet\* or Comic\* or Books or Fiction\* or Manga\* or Pamphlet\* or Brochure\* or Movie\* or Film\* or Motion Picture\* or Cinema\* or CD-ROM or DVD or Compact Disk\* or Compact Disc\* or Game or Games or Gaming or Internet or Web or Website\* or Computer or Play or Plays or Roleplay\* or Story\* or Stories or Song or Songs or Sing or Singing or Tale or Tales or Toy or Toys or App or Apps or Mobile Application\* or Phone Application\* or Smartphone Application\* or iPhone Application\* or Disclos\* or Decision Making or Bad News or Doll or Dolls or Art or Arts or Music\* or Painting\* or Drawing\*)).ti. (447)

#### ***E. PubMed***

(Child\*[TI] OR Preschool\*[TI] OR Adolescen\*[TI] OR Teen\*[TI] OR Young[TI] OR Youth\*[TI] OR Schoolchild\*[TI] OR Pediatric\*[TI] OR Paediatric\*[TI] OR Boys[TI] OR Girls[TI]) AND (Cancer\*[TI] OR Carcinoma\*[TI] OR Tumour\*[TI] OR Tumor\*[TI] OR Malignan\*[TI] OR Metasta\*[TI] OR Neoplas\*[TI] OR Leukaemi\*[TI] OR Leukemi\*[TI] OR Lymphoma\*[TI] OR Sarcoma\*[TI] OR Carcinoma\*[TI] OR Oncolog\*[TI] OR Radiotherap\*[TI] OR "Radio Therap\*" [TI] OR Chemotherap\*[TI] OR Lifethreatening[TI] OR "Life Threatening"[TI] OR Terminally Ill[TI] OR Terminal Illness\*[TI] OR Terminal Condition\*[TI] OR "Terminal Care"[TI] OR Palliative[TI] OR Hospice\*[TI] OR "End of Life"[TI]) AND (Communicat\*[TI] OR Video\*[TI] OR Audio\*[TI] OR Multimedi\*[TI] OR Multi-Media[TI] OR Hypermedia[TI] OR Book[TI] OR Booklet\*[TI] OR Comic\*[TI] OR Books[TI] OR Fiction\*[TI] OR Manga\*[TI] OR Pamphlet\*[TI] OR Brochure\*[TI] OR Movie\*[TI] OR Film\*[TI] OR Motion Picture\*[TI] OR Cinema\*[TI] OR CD-ROM[TI] OR DVD[TI] OR Compact Disk\*[TI] OR Compact Disc\*[TI] OR Game[TI] OR Games[TI] OR Gaming[TI] OR Internet[TI] OR Web[TI] OR Website\*[TI] OR Computer[TI] OR Play[TI] OR Plays[TI] OR Roleplay\*[TI] OR Story\*[TI] OR Stories[TI] OR Song[TI] OR Songs[TI] OR Sing[TI] OR Singing[TI] OR Tale[TI] OR Tales[TI] OR Toy[TI] OR Toys[TI] OR App[TI] OR Apps[TI] OR Mobile Application\*[TI] OR Phone Application\*[TI] OR Smartphone Application\*[TI] OR iPhone Application\*[TI] OR

Disclos\*[TI] OR Decision Making[TI] OR Bad News[TI] OR Doll[TI] OR Dolls[TI] OR Art[TI] OR  
Arts[TI] OR Music\*[TI] OR Painting\*[TI] OR Drawing\*[TI]) 1073

a
